# Supplementary material for: Bedmap2: improved ice bed, surface and thickness datasets for Antarctica
Source: Copernicus journal article supplement (doi:10.5194/tc-7-375-2013), 2013-02-28
Supplement: Supplementary file [file tc-7-375-2013-supplement.pdf]

**Ice Thickness Sorties**

AGAP UK  
AGAP US  
AGASEA  
Autosub  
AWI  
BBAS  
BELARE-BELISSIMA  
CASERTZ  
CECS\_NASA  
CHINARE  
CHINARE DOME A  
CRESIS  
Delores Ferrigno  
Delores PIG  
EUFAR-SRMGlaciers  
Fimbul  
Hillary Coast  
Icebridge  
ICECAP  
Ingrid Christiansen coast bathy  
Institute  
ISODYN WISE  
ITASE  
JASE Dome F  
JASE Japanese traverse  
JASE Kohnen  
LVS Lake Vostok Survey  
Pensacola-Pole Transect  
Piernoskoe lake  
Pine Island sledge traverse  
RAE  
Recovery  
Roosevelt  
Siple  
Slessor  
Talos Dome  
Torus  
USITASE  
Vostok  
Western Marie Byrd Land  
WLK Wilkes Land Survey

**Contact Author**

Ferraccioli  
Bell  
Holt  
Jenkins  
Steinhage  
Vaughan  
Matsuoka  
Blankenship  
Casassa/Rignot  
Sun  
Sun  
Gogineni  
Bingham  
King  
Matsuoka  
Nost  
Riger Kursk  
Studinger/Krabill  
Blankenship  
  
Ross/Siegert  
Ferraccioli  
Zirizzotti/Hamilton  
Fujita  
Fujita  
Fujita  
Bell  
Blankenship  
Popov  
King  
Leichenkov/Popov  
Kirsty Langley  
Conway  
Jacobel  
Rippin  
Bianchi  
Smith  
Jacobel  
Popov  
Luyendyk  
Blankenship
